# Supplementary material
Source: publisher figshare collection journal article supplement (https://sage.figshare.com/ndownloader/files/18037943)

**Appendix 7.** Constrained correspondence analysis (CCA) assessing the variation of VEAs according to structural variables (at the tree level). Structural variables comprise height, DBH, and surface. The proportioned explained by constraining variables was of 5%. Color differences follow slopes, light grey corresponds to the windward slope and transparent corresponds to the leeward slope.

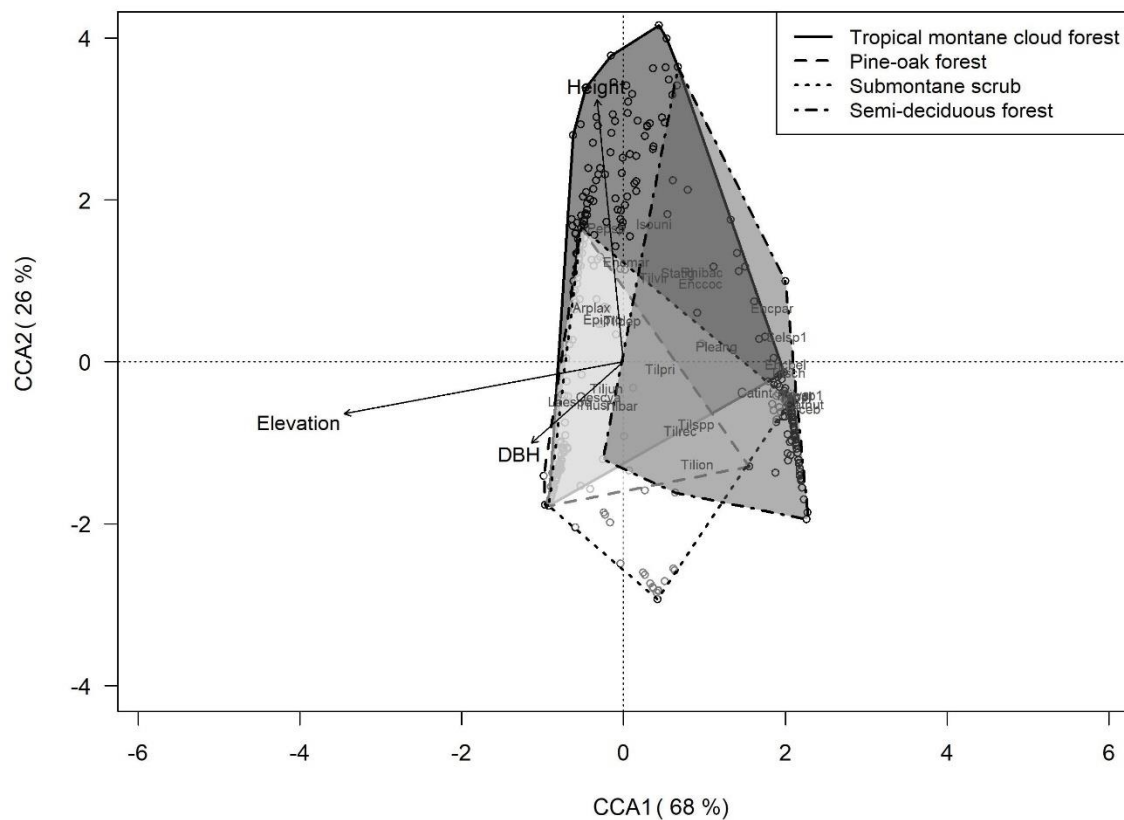

Supplement: Supplementary file 1 [file 18037943]
